# Supplementary material
Source: publisher figshare collection journal article supplement (https://acs.figshare.com/ndownloader/files/4683580)
Supplement: Supplementary file 1 [file 4683580]

## **SUPPORTING INFORMATION**

A.R. Keimowitz, B. J. Mailloux, P. Cole, M. Stute, H.J. Simpson, S.N. Chillrud

Laboratory investigations of enhanced sulfate reduction as a groundwater arsenic remediation strategy.

Five pages, including this cover sheet.

Eight tables.

**Table S1.**

| Parameter              | Observed Concentrations (mM) |        |      | Concentrations in artificial GW (mM) <sup>a</sup> |
|------------------------|------------------------------|--------|------|---------------------------------------------------|
|                        | Mean $\pm$ Std. Dev.         | Median | (N)  |                                                   |
| pH                     | 7.2 $\pm$ 1.1                | 7.1    | (25) | 7.53 (initial)                                    |
| Sodium                 | 3.57 $\pm$ 4.14              | 1.25   | (17) | 3.89                                              |
| Potassium              | 0.32 $\pm$ 0.20              | 0.28   | (20) | 0.26                                              |
| Calcium                | 1.88 $\pm$ 0.61              | 1.59   | (16) | 1.47                                              |
| Magnesium              | 0.71 $\pm$ 0.13              | 0.70   | (55) | 0.62                                              |
| Chloride               | 0.67 $\pm$ 0.29              | 0.73   | (17) | 0.86                                              |
| TIC <sup>b</sup>       | 0.33 $\pm$ 0.00              | 0.33   | (6)  | 0.32                                              |
| Sulfate                | 2.97 $\pm$ 3.92              | 0.97   | (17) | 3.56                                              |
| Phosphate <sup>c</sup> | --                           | --     |      | 0.05                                              |

**Geochemical parameters from groundwater monitoring (1999-2000) and artificial groundwater composition.**

<sup>a</sup> No iron or arsenic were added to the artificial groundwater; concentrations were assumed to be negligible.

<sup>b</sup> Total inorganic carbon was measured; carbonate was added to artificial groundwater as the only source of inorganic carbon.

<sup>c</sup> Phosphate was not measured for field monitoring, so a typical groundwater concentration was added to artificial groundwater.

**Table S2.**

| # | Reaction                                                                                                          | Log K |
|---|-------------------------------------------------------------------------------------------------------------------|-------|
| 1 | $\text{As(OH)}_3^0 + \text{HS}^- + \text{H}^+ \leftrightarrow \text{As(OH)}_2\text{SH} + \text{H}_2\text{O}$      | 8.69  |
| 2 | $\text{As(OH)}_3^0 + \text{HS}^- \leftrightarrow \text{As(OH)}_2\text{S}^- + \text{H}_2\text{O}$                  | 3.54  |
| 3 | $\text{As(OH)}_2\text{S}^- + \text{HS}^- \leftrightarrow \text{As(OH)S}_2^{2-} + \text{H}^+$                      | 5.06  |
| 4 | $\text{As(OH)S}_2^{2-} + \text{HS}^- + \text{H}^+ \leftrightarrow \text{AsS}_3\text{H}^{2-} + \text{H}_2\text{O}$ | 11.78 |
| 5 | $\text{As(OH)S}_2^{2-} + \text{HS}^- \leftrightarrow \text{AsS}_3^{3-} + \text{H}_2\text{O}$                      | 3.89  |

**Reactions reported in Wilkin et al (24) for formation of thioarsenites. Reactions 1 and 4 are less favorable under the incubation conditions reported here due to the relatively high pH (low [H<sup>+</sup>]).**

**Table S3.**

| <b>Incubation period</b>         | <b>Geochemical Conditions</b> | <b>_ [As]</b> | <b>_ [Fe]</b> | <b>_ [Mn]</b> |
|----------------------------------|-------------------------------|---------------|---------------|---------------|
| 0 to 8 days                      | Rising As, Fe, Mn             | 1.66          | 110.34        | 4.65          |
| 8 to 13 days                     | Falling As, Fe, Mn            | (1.58)        | (102.85)      | (3.37)        |
| 13 to 28 days                    | Rising As, stable Fe, Mn      | 1.13          | (7.37)        | (2.05)        |
| 28 to 39 days                    | Falling As, stable Fe, Mn     | (1.17)        | 0.14          | 0.02          |
| 39 to 79 days                    | Stable As, Fe, Mn             | (0.08)        | (0.11)        | 0.00          |
| 0 to 79 days                     |                               | (0.04)        | 0.14          | (0.74)        |
| Maximum concentration to 79 days |                               | (1.70)        | (110.19)      | (5.58)        |

**Arsenic, iron, and manganese mass balances for the microcosm incubations during key geochemical time periods. The change in aqueous concentrations is shown, with decreasing concentrations shown in parentheses; net changes are assumed to be due to transfer of mass to the solid phase. Concentrations are in  $\mu\text{mol L}^{-1}$ .**

**Table S4**

| <b>Incubation period</b> | <b>_ [SO<sub>4</sub>]<br/>(by IC)</b> | <b>_ [HS]<br/>(by colorimetry)</b> | <b>_ <math>\Sigma</math>[S]<br/>([SO<sub>4</sub>] + [HS])</b> | <b>_ <math>\Sigma</math>S<br/>(by ICPMS)</b> |
|--------------------------|---------------------------------------|------------------------------------|---------------------------------------------------------------|----------------------------------------------|
| 0 to 8 days              | 0 <sup>a</sup>                        | 0                                  | 0.00                                                          | 2.23                                         |
| 8 to 13 days             | (0.79)                                | 0.02                               | (0.77)                                                        | (1.09)                                       |
| 13 to 28 days            | (2.88)                                | 1.25                               | (1.63)                                                        | (7.26)                                       |
| 28 to 39 days            | 0.08                                  | (0.52)                             | (0.44)                                                        | (0.42)                                       |
| 39 to 79 days            | 0.11 <sup>b</sup>                     | (0.41)                             | (0.30)                                                        | (0.04)                                       |
| 0 to 79 days             | (3.70) <sup>b</sup>                   | 0.34                               | (3.36)                                                        | (8.81)                                       |

**Sulfur mass balance for the microcosm incubations. The change in aqueous concentrations is shown, with decreasing concentrations shown in parentheses; net changes are assumed to be due to transfer of mass to the solid phase and some transfer of sulfide to the gas phase. Concentrations are in  $\text{mmol L}^{-1}$ .**

<sup>a</sup>As noted in the text, the IC sample at 0 days was lost, so the initial SO<sub>4</sub> concentration was estimated as the first measured concentration.

<sup>b</sup>No IC sample was available for 79 days, so the final SO<sub>4</sub> concentration was taken to be that measured at 44 days.

**Table S5.**

| <b>Incubation Period</b> | <b>Δ[Acetate]</b>   | <b>Δ[Carbonate]<br/>from alkalinity</b> | <b>Σ_C</b> |
|--------------------------|---------------------|-----------------------------------------|------------|
| 0 to 8 days              | (5.57) <sup>a</sup> | 5.40                                    | (5.74)     |
| 8 to 13 days             | (7.35)              | (2.89)                                  | (17.58)    |
| 13 to 28 days            | (7.08)              | 2.64                                    | (11.53)    |
| 28 to 39 days            | 0.00 <sup>a</sup>   | (0.15)                                  | (0.15)     |
| 39 to 79 days            | 0.00                | 1.72                                    | 1.72       |
| 0 to 79 days             | (20.00)             | 6.72                                    | (33.28)    |

**Carbon mass balance for the microcosm incubations. The change in aqueous concentrations is shown, with decreasing concentrations shown in parentheses; net changes are assumed to be due to transfer of mass to the solid phase as carbonate minerals as well as increasing CO<sub>2</sub> and CH<sub>4</sub> concentrations in the headspace. Concentrations are in mmol L<sup>-1</sup>.**

<sup>a</sup>As noted in the text, the IC sample at 0 days was lost, so the initial acetate concentration was estimated as the first measured concentration.

<sup>b</sup>Acetate was below detection from 28 days until the end of the experiment.

**Table S6.**

| <b>Incubation period</b>         | <b>Geochemical Conditions</b> | <b>Δ[As]</b> | <b>Δ[Fe]</b> | <b>Δ[Mn]</b> |
|----------------------------------|-------------------------------|--------------|--------------|--------------|
| 0 to 12 days                     | Rising As, Fe, Mn             | 0.82         | 28.78        | 1.96         |
| 12 to 28 days                    | Falling As, Fe, Mn            | (0.96)       | (28.85)      | (2.63)       |
| 28 to 40 days                    | ~Steady As, Fe, Mn            | 0.39         | 0.14         | 0.11         |
| 0 to 40 days                     |                               | 0.25         | 0.07         | (0.56)       |
| Maximum concentration to 40 days |                               | (0.57)       | (30.11)      | (2.53)       |

**Arsenic, iron, and manganese mass balances for the reactor incubation. The change in aqueous concentrations is shown, with decreasing concentrations shown in parentheses; net changes are assumed to be due to transfer of mass to the solid phase. Concentrations are in μmol L<sup>-1</sup>**

**Table S7.**

| <b>Incubation<br/>period</b> | <b>_<math>[\text{SO}_4]</math><br/>(by IC)</b> | <b>_<math>[\text{HS}]</math><br/>(by colorimetry)</b> | <b>_<math>\Sigma[\text{S}]</math><br/>(<math>[\text{SO}_4] + [\text{HS}]</math>)</b> |
|------------------------------|------------------------------------------------|-------------------------------------------------------|--------------------------------------------------------------------------------------|
| 0 to 12 days                 | (1.65)                                         | 0.00                                                  | (1.65)                                                                               |
| 12 to 28 days                | (0.65)                                         | 0.44                                                  | (0.21)                                                                               |
| 28 to 40 days                | (2.29)                                         | 0.18                                                  | (2.11)                                                                               |
| 0 to 40 days                 | (4.60)                                         | 0.63                                                  | (3.97)                                                                               |

**Sulfur mass balance for the reactor incubation. The change in aqueous concentration is shown, with decreasing concentrations shown in parentheses; net changes are assumed to be due to transfer of mass to the solid phase and transfer of sulfide to the gas phase. Concentrations are in  $\text{mmol L}^{-1}$ .**

**Table S8.**

| <b>Incubation<br/>Period</b> | <b>_<math>[\text{Acetate}]</math></b> | <b>_<math>[\text{Carbonate}]</math><br/>from alkalinity</b> | <b><math>\Sigma\_C</math></b> |
|------------------------------|---------------------------------------|-------------------------------------------------------------|-------------------------------|
| 0 to 12 days                 | (11.12)                               | (0.42)                                                      | (22.65)                       |
| 12 to 28 days                | (11.48)                               | 0.64                                                        | (22.33)                       |
| 28 to 40 days                | (10.16)                               | 0.62                                                        | (19.71)                       |
| 0 to 40 days                 | (32.76)                               | 0.84                                                        | (64.69)                       |

**Carbon mass balance for the reactor incubation. The change in aqueous concentration is shown, with decreasing concentrations shown in parentheses; Net changes are assumed to be due to transfer of mass to the solid phase as carbonate minerals as well as  $\text{CO}_2$  and  $\text{CH}_4$  which may have escaped from the reactor. Concentrations are in  $\text{mmol L}^{-1}$ .**
